# Supplementary material for: Coordinative trends of a tridentate thiosemicarbazone ligand: synthesis, characterization, luminescence studies and desulfurization processes
Source: Royal Society of Chemistry journal article supplement (doi:10.1039/b908782f), 2009-01-01
Supplement: b908782f.pdf [file b908782f.pdf]

## Coordinative Trends of a Tridentate Thiosemicarbazone Ligand: Synthesis, Characterization, Luminescence Studies and Desulfurization Processes

Rosa Pedrido,<sup>a\*</sup> María J. Romero,<sup>a</sup> Manuel R. Bermejo,<sup>a</sup> Miguel Martínez-Calvo,<sup>a</sup> Ana M. González-Noya,<sup>b</sup> Guillermo Zaragoza<sup>c</sup>

<sup>a</sup> *Departamento de Química Inorgánica, Facultade de Química, Universidade de Santiago de Compostela, Santiago de Compostela, Galicia, E-15782, Spain*

<sup>b</sup> *Departamento de Química Inorgánica, Facultade de Ciencias, Universidade de Santiago de Compostela, Lugo, Galicia, E-27002, Spain*

<sup>c</sup> *Unidade de Difracción de Raios X, Edificio CACTUS, Universidade de Santiago de Compostela, Campus Sur, Santiago de Compostela, Galicia, E-15782, Spain.*

### Electronic supplementary information

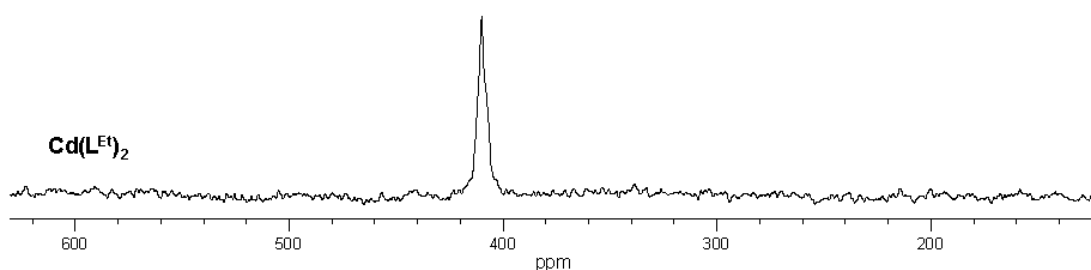

**Figure S1.** <sup>113</sup>Cd NMR spectrum of Cd(L<sup>Et</sup>)<sub>2</sub> (**11**)

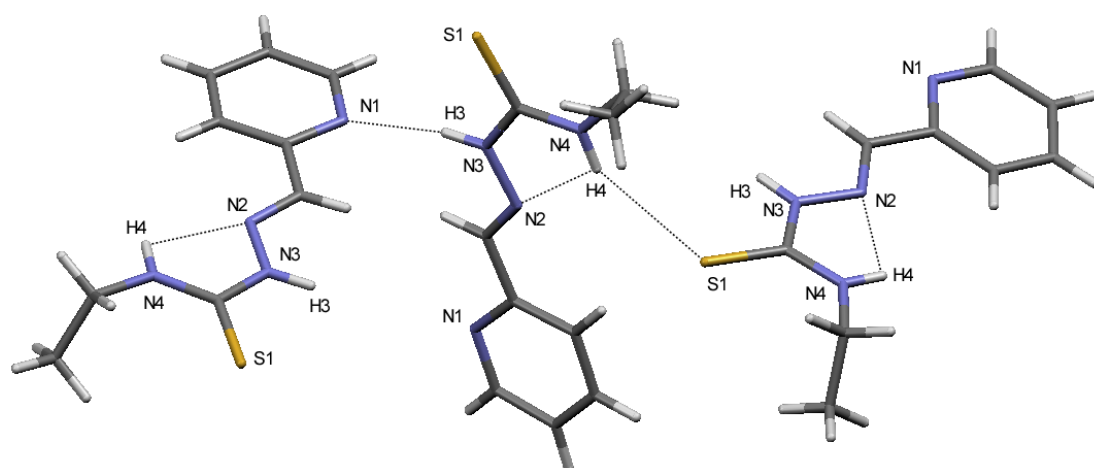

**Figure S2.** Detail of the 1D structure originated by the establishment of intramolecular and intermolecular hydrogen bond interactions in the ligand  $HL^{Et}$ .

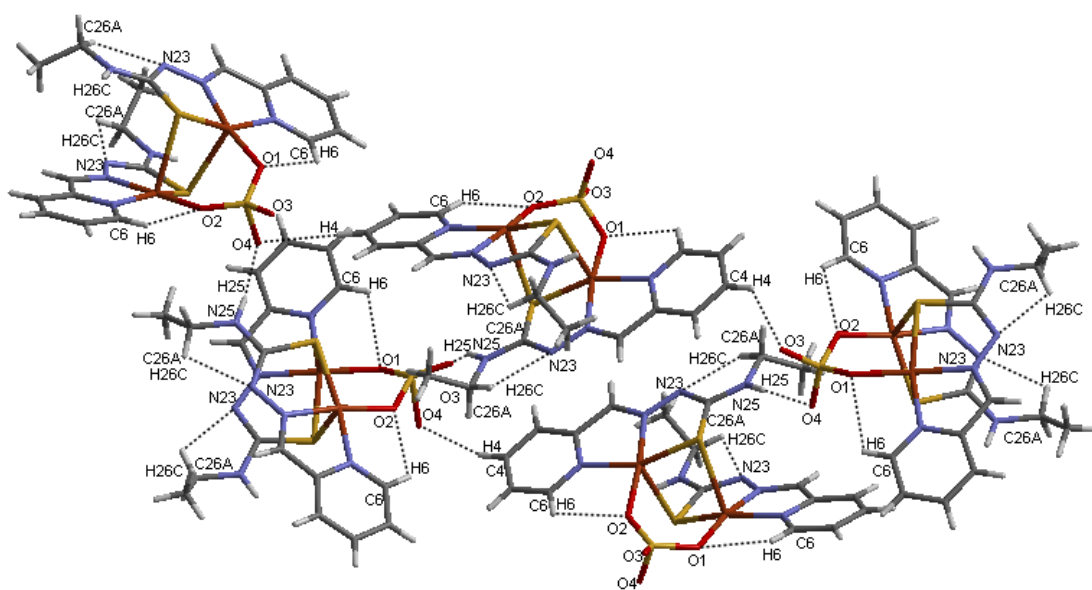

**Figure S3.** Hydrogen bond interactions in the complex  $[\text{Cu}_2(\text{L}^{\text{Et}})_2(\text{SO}_4)] \cdot 7$

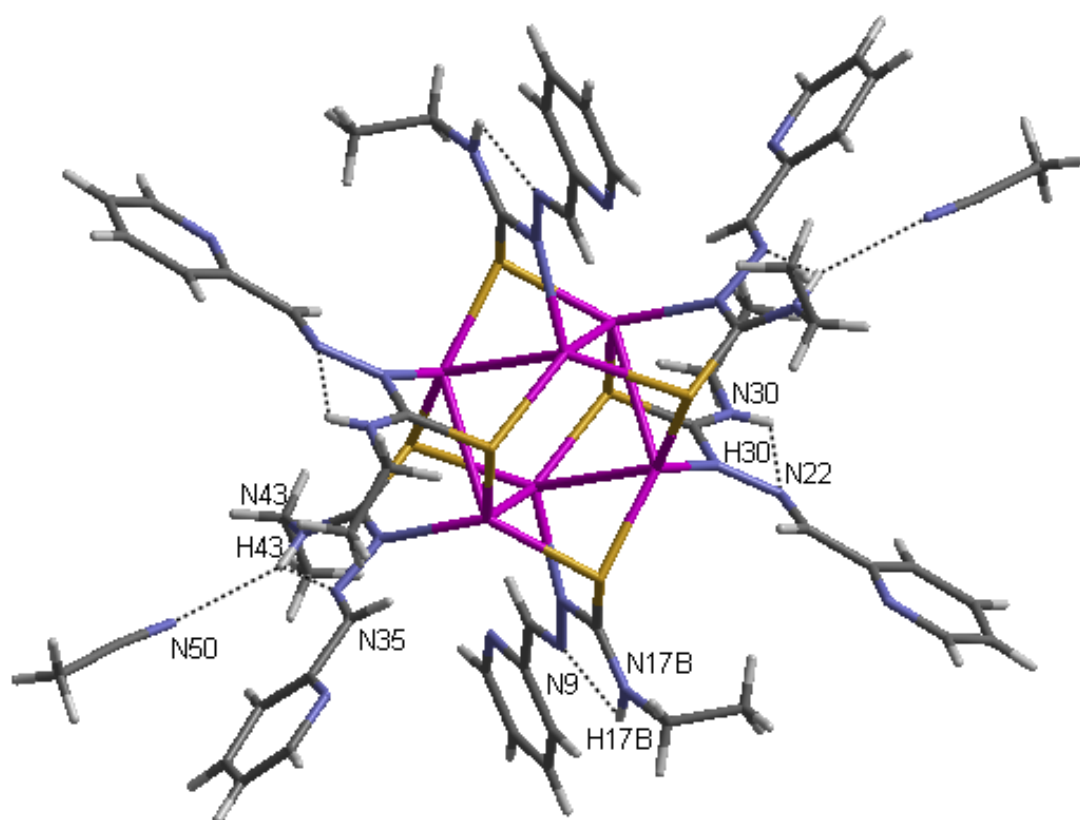

**Figure S4.** Hydrogen bond interactions in the complex  $[Ag_6(L^{Et})_6] \cdot CH_3CN$  **9**

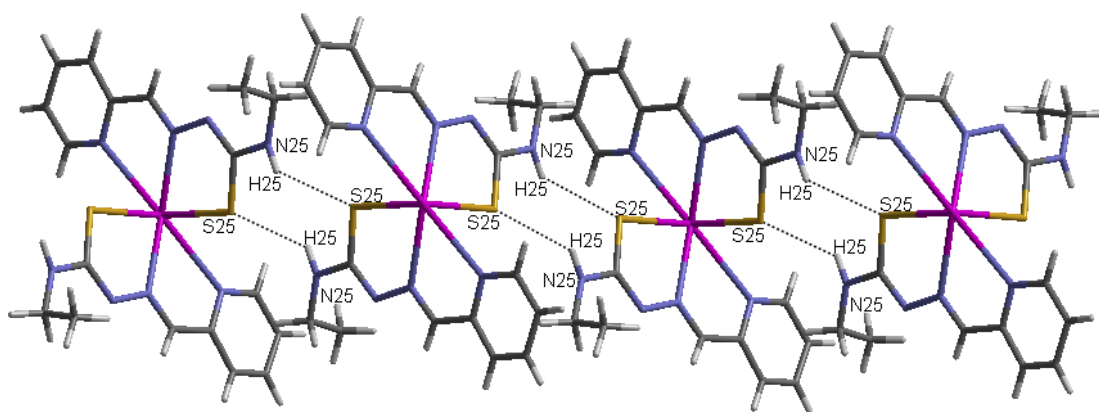

**Figure S5.** Hydrogen bond interactions in the complex [Pb(L<sup>Et</sup>)<sub>2</sub>] 12
